# Supplementary material for: Polyploidy in the adult Drosophila brain
Source: eLife. 2020 Aug 25;9:e54385. doi: 10.7554/eLife.54385 (PMC7447450; doi:10.7554/eLife.54385)
Supplement: Figure 1—source data 1. [file elife-54385-fig1-data1.csv]

	Male	Male	Male	Male	Male	Male	Male	Male	Male	Male	Female	Female	Female	Female	Female	Female	Female	Female	Female	Female
1	0.65	0.79	0.94	0.92	1.12	1.2	1.2	1.16	0.93	1.28	0.67	0.52	0.87	1	0.84	0.65	1.439	0.52	0.8	0.97
7	6.03	4.92	5.58	9.53	6.46	5.64	8.520001	8.17	8.35	6.26	5.08	4.13	3.28	3.7	6.5	5.02	5.31	6.21	6.33	7.58
14	9.49	8.03	5.62	7.64	5.93	5.6	5.89	7.41	9.33	5.57	5.23	4.16	4.6	7.36	10.3	8.03	4.6	7.36	11.33	7.85
21	8.41	10.96	9.88	8.89	11.21	9.75	8.54	10.9	9.94	10.26	5.66	4.19	4.77	9.46	6.5	5.03	5.78	8.45	6.05	8.46
28	8.02	9.28	10.52	10.38	9.71	10.07	9.86	9.1	8.1	9.53	5.83	13.27	13.4	6.85	6.28	13.01	13.66	6.4	9.6	9.85
35	7.26	7.24	7.72	7.38	11.08	10.48	10.53	8.64	9.58	13.58	11.4	3.6	11.26	11.88	11.6	9.63	10.47	11.99	9.53	4.2
42	8.07	5.79	7.13	8.84	10.98	11.26	9.74	8.85	7.63	7.21	7.9	7.24	7.44	5.24	8.2	6.93	7.75	4.94	6.23	7.76
49	6.81	8.04	10.24	9.55	7.08	11.27	11.47	11.79	11.99	15.64	7.48	9.7	9.06	9.05	7.679	9.9	9.12	8.988	8.63	9.016
56	11.18	8.33	6.53	8.56	11.62	13.16	13	13.06	4.83	8.64	12.7	14.22	11.65	13.36	12.87	13.21	12.92	11.8	12.97	11.73
