# Supplementary material for: Polyploidy in the adult Drosophila brain
Source: eLife. 2020 Aug 25;9:e54385. doi: 10.7554/eLife.54385 (PMC7447450; doi:10.7554/eLife.54385)
Supplement: Figure 1—source data 2. [file elife-54385-fig1-data2.csv]

	Male	Male	Male	Male	Male	Female	Female	Female	Female	Female
1	2.32	1.52	2.16	1.88	2.34	0.98	0.85	3.04	2.45	3.34
7	8.31	5.58	8.93	9.7	8.95	6.48	7.2	5.2	6.3	5.9
14	6.2	5.84	8.74	13.28	11.59	7.64	8.43	14.87	11.52	12.32
21	10.52	12.34	13.89	9.48	11.3	11.89	14.24	14.6	16.12	13.38
28	13.54	12.41	17.04	11.56	12.76	12.53	9.07	8.38	10.08	9.01
35	10.42	14.41	11.18	10.46	9.7	14.55	8.13	10.57	11.68	9.13
