# Supplementary material for: Polyploidy in the adult Drosophila brain
Source: eLife. 2020 Aug 25;9:e54385. doi: 10.7554/eLife.54385 (PMC7447450; doi:10.7554/eLife.54385)
Supplement: Figure 2—source data 1. [file elife-54385-fig2-data1.csv]

		Polyploid	Polyploid	Polyploid	Diploid	Diploid	Diploid
All cells		6.4	7.6	8.12	93.6	92.4	91.88
Neurons		5.04	7.74	6.39	84.96	82.26	83.61
Glia		0.723	0.85	0.68	9.277	9.15	9.32
