# Supplementary material for: Polyploidy in the adult Drosophila brain
Source: eLife. 2020 Aug 25;9:e54385. doi: 10.7554/eLife.54385 (PMC7447450; doi:10.7554/eLife.54385)
Supplement: Figure 2—source data 2. [file elife-54385-fig2-data2.csv]

	Polyploid	Polyploid	Polyploid	Diploid	Diploid	Diploid
All Neurons	15.2	14	15.8	84.8	86	84.2
GABAergic	22.5	22.98	23.52	77.5	77.02	76.48
Glutamatergic	20.89	22.13	25.01	79.11	77.87	74.99
Cholinergic	11.46	10.325	13.215	88.54	89.675	86.785
TM3a	21.365	24.25	21.385	78.635	75.75	78.615
DM9	24.322	25.002	21.679	75.678	74.998	78.321
DM4	33.15	32.01	34.84	66.85	67.99	65.16
DM10	33.5	32.89	33.12	66.5	67.11	66.88
DM2	27	25.854	28.146	73	74.146	71.854
