# Supplementary material for: Polyploidy in the adult Drosophila brain
Source: eLife. 2020 Aug 25;9:e54385. doi: 10.7554/eLife.54385 (PMC7447450; doi:10.7554/eLife.54385)
Supplement: Figure 2—source data 3. [file elife-54385-fig2-data3.csv]

	Polyploid	Polyploid	Polyploid	Diploid	Diploid	Diploid
All Glia	7.23	8.5	6.8	92.77	91.5	93.2
Astrocyte-like glia	17.12	16.23	17.65	82.88	83.77	82.35
Cortex Glia	28.21	26.005	29.79	71.79	73.995	70.21
Wrapping glia	35.021	33.875	36.09	64.979	66.125	63.91
