# Supplementary material for: Polyploidy in the adult Drosophila brain
Source: eLife. 2020 Aug 25;9:e54385. doi: 10.7554/eLife.54385 (PMC7447450; doi:10.7554/eLife.54385)
Supplement: Figure 4—figure supplement 2—source data 1. [file elife-54385-fig4-figsupp2-data1.csv]

All cells measured (ploidy from normalized Dapi integrated intensity)	Coinflp yellow cells ploidy	coinflip double pos_Elav pos_ cell ploidy
12.7182739	12.7182739	4.08449312
4.72560323	5.36061929
1.4782179	4.59729886
2.15885695	2.50407642
1.98369431	5.56913448
2.35131351	3.29654945
2.77221444	3.69274479
3.38927777	7.55579346
2.02001153	2.95470642
2.5281232	4.16190398
2.0625875	5.98707074
1.59136951	2.60380466
2.01424689	4.08449312
2.44832414	10.334102
2.26632628
1.68310961
1.90150704
5.36061929
4.59729886
1.69373301
2.04307008
2.04710533
1.96014165
1.76290867
4.3592193
1.45120646
1.61821626
1.73746191
1.09025776
2.4967471
2.50407642
1.60273409
2.01935271
2.07955201
2.06695215
1.93304785
2.51675863
1.5972165
1.73046199
1.88207198
1.84353125
5.56913448
3.29654945
2.3465371
2.18644487
2.51445277
1.74512065
2.3403607
2.25520876
2.23832661
1.68220374
2.34843119
5.76686157
2.19369184
2.27752615
2.03434077
2.07403442
2.2088446
2.13184551
2.11043399
2.00444701
2.21633863
2.11191633
2.01638804
2.02635263
2.40739521
1.65585111
3.69274479
7.55579346
2.95470642
1.97521206
1.72123857
1.96425924
1.59894589
2.23791485
1.79922589
1.66688627
1.62612205
2.13019847
1.84114305
2.35444289
1.7827555
1.73532076
2.74026188
2.30544347
4.16190398
1.76562629
1.93625957
2.14979824
2.57860496
2.24713827
1.8580252
2.00279997
2.39051305
1.84624887
2.00518817
5.98707074
9.97191798
9.74462653
2.02404678
2.23840896
2.17228033
2.17639792
2.13242197
2.00131763
2.06966977
2.32067858
2.30536111
2.60380466
2.10228115
1.78786132
1.94120069
1.94309479
1.68047435
1.76241456
3.1608334
2.12064564
3.76949683
1.87103681
2.14304538
2.21584452
1.91756568
2.04562299
4.08449312
10.334102
2.24664416
1.88973071
2.63163963
3.254797
2.8581899
2.24162069
1.94688298
