# Supplementary material for: Polyploidy in the adult Drosophila brain
Source: eLife. 2020 Aug 25;9:e54385. doi: 10.7554/eLife.54385 (PMC7447450; doi:10.7554/eLife.54385)
Supplement: Figure 4—source data 1. [file elife-54385-fig4-data1.csv]

Early FLP 1d	Late FLP 1d	Early FLP 14d	Late FLP 14d
2	3	7	206
0	0	12	450
0	0	3	421
0	0	8	340
5	1	13	289
6	2	2	256
1	4	0	363
2	6	5	214
