# Supplementary material for: Polyploidy in the adult Drosophila brain
Source: eLife. 2020 Aug 25;9:e54385. doi: 10.7554/eLife.54385 (PMC7447450; doi:10.7554/eLife.54385)
Supplement: Figure 6—source data 1. [file elife-54385-fig6-data1.csv]

	Male PQ	Male PQ	Male PQ	Male PQ	Male PQ	Male Control	Male Control	Male Control	Male Control	Male Control
1	0.65	0.79	0.94	1.12	1.2	0.65	0.79	0.94	1.12	1.2
7	11.66	9.9	8.62	8.66	9.72	6.03	4.92	5.58	6.46	5.64
14	11.6	11.69	8.8	11.45	9.042	9.49	8.03	5.62	5.93	5.6
21	10.35	8.25	7.56	10.1	9.072	8.41	10.96	9.88	11.21	10.96
28	12.29	12.81	15.37	11.92	7.05	8.020001	9.28	10.52	9.71	10.07
35	8.91	10.07	11.08	9.04	9.78	7.26	7.24	7.72	11.08	10.48
