# Supplementary material for: Polyploidy in the adult Drosophila brain
Source: eLife. 2020 Aug 25;9:e54385. doi: 10.7554/eLife.54385 (PMC7447450; doi:10.7554/eLife.54385)
Supplement: Figure 6—source data 2. [file elife-54385-fig6-data2.csv]

	Male	Male	Male	Male	Male	Male	Male	Male	Male	Male	Female	Female	Female	Female	Female	Female	Female	Female	Female	Female
1	2.67	2.01	2.72	2.13	2.25	2.13	2.21	1.68	2.86	2.1	1.64	1.63	1.12	1.86	1.78	1.66	3.16	3.66	2.47	2.41
7	3.59	3.95	6.19	5.67	5.94	2.19	4.46	5.12	5.87	5.13	4.41	4.67	5.27	4.45	3.81	2.6	3.38	4.05	4.69	4.11
14	6.34	3.72	3.36	5.11	4.91	3.62	3.21	3.02	5.23	4.6	3.29	4.4	5.08	6.08	4.92	9.66	5.53	4.83	3.72	4.08
21	6.45	4.55	5.58	7.89	6.66	5.4	5.1	4.02	4.49	5.47	4.23	2.89	4.47	7.1	3.33	4.12	4.46	6.06	5.1	4.28
28	4.79	5.27	4.67	4.96	2.63	3.42	3.62	3.37	5.1	3.11	3.72	3.2	4.59	3.29	4.12	4.56	5.12	5.09	3.12	2.19
35	2.91	4.13	3.78	4.44	4.56	4.4	5.09	5.19	4.88	5.8	3.84	4.61	5.74	5	4.89	4.47	5.39	4.78	6.89	5.9
42	3.09	3.38	3.36	4.24	5.34	5.8	4.76	3.4	4.29	4.37	4.77	3.63	5.27	4.08	5.78	6.01	5.02	4.89	4.25	5.3
49	2.93	4.16	3.93	4.19	4.71	4.17	4.92	3.45	3.69	4.05	4.64	4.66	3.74	5.68	3.86	4.8	6.12	5.42	6.23	7.12
56	4.8	2.97	5.08	5.71	13.96	7.64	8.1	7.65	3.2	4.12	7.87	6.39	4.59	6.79	5.44	3.12	4.65	5.07	4.9	5.23
