# Supplementary material for: Polyploidy in the adult Drosophila brain
Source: eLife. 2020 Aug 25;9:e54385. doi: 10.7554/eLife.54385 (PMC7447450; doi:10.7554/eLife.54385)
Supplement: Figure 6—source data 3. [file elife-54385-fig6-data3.csv]

	PI+ve (dead or dying)	PI+ve (dead or dying)	PI+ve (dead or dying)	PI-ve (live)	PI-ve (live)	PI-ve (live)
Diploid	21.87	23.4	28.4	78.13	76.6	71.6
Polyploid	3.2	3.6	2.6	96.8	96.4	97.4
