# Supplementary material for: Polyploidy in the adult Drosophila brain
Source: eLife. 2020 Aug 25;9:e54385. doi: 10.7554/eLife.54385 (PMC7447450; doi:10.7554/eLife.54385)
Supplement: Figure 6—source data 5. [file elife-54385-fig6-data5.csv]

	Control	Control	Control	UV Treated	UV Treated	UV Treated
24h PE	18.4	19.2	19.1	19.1	22.2	22.3
48h PE	21.3	20.07	20.3	24.3	24.03	25.09
5d PE	23.09	21.4	22.74	26.2	25.4	26.2
